# Supplementary material
Source: PubMed Central journal article supplement (PMC4643064)
Supplement: NIHMS733011-supplement-Supplement1.pdf [file NIHMS733011-supplement-Supplement1.pdf]

## Supplementary Appendix

This appendix has been provided by the authors to give readers additional information about their work.

Supplement to: Baron JA, Barry EL, Mott LA, et al. A trial of calcium and vitamin D for the prevention of colorectal adenomas. *N Engl J Med* 2015;373:1519-30. DOI: 10.1056/NEJMoa1500409

## ONLINE SUPPLEMENT

Supplement to:

Baron JA, Barry EL, Mott LA, Rees JR, Sandler RS, Snover DC, Bostick RM, Ivanova A, Cole BF, Ahnen DJ, Beck GJ, Bresalier RS, Burke CA, Church TR, Cruz-Correa M, Figueiredo JC, Goodman M, Kim AS, Robertson DJ, Rothstein R, Shaikat A, Seabrook ME, Summers RW. A Trial of Calcium and Vitamin D for the Prevention of Colorectal Adenomas

### Contents

|                                                                                                                    |    |
|--------------------------------------------------------------------------------------------------------------------|----|
| Acknowledgements                                                                                                   | 2  |
| Statistical power and sample size considerations                                                                   | 3  |
| Pathology procedures and rules                                                                                     | 3  |
| Table S1. Resolution of disagreements between the study pathologist and local pathologists                         | 4  |
| Measurement of serum calcium, creatinine and 25-OH Vitamin D;                                                      | 5  |
| Computation of seasonally adjusted serum 25-OH Vitamin D                                                           | 5  |
| Semiannual estimation of dietary calcium intake                                                                    | 5  |
| Randomization of Ineligible Participants                                                                           | 5  |
| Figure S1. Consort diagram                                                                                         | 6  |
| Figure S2. Subgroup Treatment Effects for Supplementation with Calcium or Vitamin D: One or More Advanced Adenomas | 7  |
| Table S2. Years from randomization to final colonoscopy                                                            | 8  |
| Table S3. Adenoma risk ratios by anatomic location                                                                 | 9  |
| Table S4. Adenoma risk ratios by baseline supplement use                                                           | 10 |
| Table S5. Advanced adenoma risk ratios by baseline supplement use                                                  | 11 |
| Table S6. Adenoma risk ratios by baseline advanced/multiple adenoma status                                         | 12 |
| Table S7. Per protocol analysis                                                                                    | 13 |
| Table S8. Observational Adenoma risk ratios for change in serum 25-OH-vitamin D and calcium Intake                 | 14 |
| Table S9. Adenoma risk ratios by anticipated colonoscopic surveillance interval                                    | 15 |
| Table S10. Sensitivity analysis for missing data                                                                   | 16 |

## **Acknowledgements**

The Vitamin D/Calcium Polyp Prevention Study Group acknowledges the following individuals listed alphabetically within each study site:

**Investigators:** Dartmouth-Hitchcock Medical Center, Lebanon, NH: A. Alrakawi, S. Bensen, A. Damianos, D. Howell, D. Rath, R. Thompson; Emory University: J. S. Mandel, R. Rutherford, M. Wehbi; University of Colorado: T. Byers, S. R. Freeman, J. S. Levine; University of Iowa: N.S. Dusdieker, J.R. Ewing, B. I. Leman, R. Lengeling, J. Piros, S. Reddy, W. Silverman, G. Weinman; University of Minnesota: J. I. Allen, J. H. Bond, K. D. Wilson; University of North Carolina: L. Gangarosa; University of Puerto Rico: H. Gonzalez, R. Mosquera, F. Ramos, D. Toro; University of Southern California: C. Conteas, D. Gerety, R.W. Haile, L. Laine, T. Lee, T. Zarchy; University of Texas: A. Dekovich, G. Raju, J. R. Stoehein.

**Study Coordinators and Staff:** Cleveland Clinic: J. Bauman, H. Hasson; Dartmouth-Hitchcock Medical Center, Lebanon, NH: E. Belles, P. Doughty, T. George, P. Goralski, B. Hewitt, V. Kelly, L. Matchem, C. Swasey, L. Wettimann, K. Wood; Emory University: J. Brockman, J. Woodard; University of Colorado: L. Brandes, K. Camp, J. Cisek, T. Dunn, A. Rietema, E. Schleski, A. Therrian; University of Iowa: B. Musgrave, R. Thompson; University of Minnesota: P. Beckmann, D. Engelhard, P. Stout, J. Stromberg; University of North Carolina: K. Jeremiah, K. Lezama, J. Maloney, B. Schliebe; University of Puerto Rico: J. Hernandez; Consultants in Gastroenterology, West Columbia, SC: R. Caldwell, A. Dawan, K. Todd; University of Southern California: L. Gerstmann, Y. Perez, A. Rivera; University of Texas: J. Foreman, R. Holley, P. Robichaux, T. Smith, T. Tipps.

**Dartmouth Project Coordination Center:** D. Aman, K. Anton, B. Beaulieu, K. Collins, S. Ewell, R. Harmelin-Kadouri, J. Hebb, S. Jacobson, L. Johnson, J. Mullaly, S. Pierson, S. Rovell-Rixx, A. Swoyer.

**University of California at Los Angeles, Nutrition Biomarker Laboratory:** Susanne Henning

**Data and Safety Monitoring Committee:** W. Willett (Chairman; Harvard University, Boston, MA), F. Giardiello (John Hopkins University School of Medicine, Baltimore, MD), M. Holick (Boston University School of Medicine, Boston, MA), P. Holt (Rockefeller University, New York, NY), J. Neaton (University of Minnesota, Minneapolis, MN), G. Curhan (consultant; Harvard School of Public Health, Boston, MA), W. Malone (ex officio member; National Cancer Institute, Bethesda, MD), A. Umar (ex officio member; National Cancer Institute, Bethesda, MD).

**Support:** Pfizer Consumer Healthcare provided the study agents.

**Acknowledgment:** We thank all the individuals who participated in this clinical trial.

### **Statistical power and sample size considerations**

For the primary endpoints, we originally planned to randomize 1966 participants to achieve 0.89 power for a vitamin D risk ratio of 0.80 (assuming a calcium risk ratio of 0.80), 0.79 for a calcium risk ratio of 0.80 (assuming a vitamin D risk of 0.75), and 0.85 for a risk ratio of 0.75 between vitamin D plus calcium vs. calcium alone, each comparison using  $\alpha = 0.05$ . Subsequently, we increased enrollment to increase representation of women, minorities, and high-risk participants (with  $\geq 3$  adenomas or an advanced adenoma at baseline).

### **Pathology procedures and rules**

Excised tissue was classified as representing a “lesion”, a “biopsy” or a “cluster.” A lesion was defined as a relatively circumscribed area of abnormal-appearing mucosa, consistent with neoplasia. A biopsy was defined as tissue from an undirected excision of normal-appearing mucosa (as might be obtained for diagnosis of diarrhea) or directed at a broad area of abnormality (e.g. erythema, as might be obtained to investigate inflammation). Missing pathology for a biopsy was not considered missing with regard to lesion outcomes. A cluster was defined as a group of diminutive (<5mm), typically sessile, lesions in the distal colorectum. A cluster located in the rectum that had no tissue available for diagnosis was assumed to be comprised of hyperplastic polyps.

Size and location information for colorectal lesions was generally taken from the endoscopy reports. If not recorded there, these data were taken from the pathology report where possible. If size was reported as a range, the midpoint of the range was recorded. If location was given in distance from the anus,  $\leq 15$  cm was assumed to be in the rectum, 16-40 cm in the sigmoid or descending colon (indeterminate as to which) and  $>40$  cm an unknown location. The lesion diagnosis from the local pathologist was taken from the pathology report. If the degree of dysplasia for an adenoma was not reported, it was assumed to be mild/moderate. If a polyp was reported on more than one colonoscopy, the largest size and the most aggressive histological diagnosis for that polyp was used in analyses.

In this study, advanced adenomas were virtually always relatively large: Among lesions with available tissue, only 2% of those less than 0.6 cm in estimated size were advanced adenomas. Therefore, when there was no tissue available from a lesion less than 0.6 cm, it was assumed the lesion was *not* an advanced adenoma (but could have been a tubular adenoma or a serrated polyp).

The study pathologist reviewed all available tissue removed from the large bowel and classified each lesion as an adenoma, serrated polyp, or other (non-neoplastic) lesion. In the event of a diagnostic disagreement with the local pathologist, the study pathologist performed a second blinded read as specified in the table below. The second read by the study pathologist was taken as the final diagnosis unless it differed from both the local diagnosis and the first read by the study pathologist. In this case, a third unblinded reading was conducted by the study pathologist to adjudicate the diagnosis. In all cases, the study pathologist read the same slides as those seen by the local pathologists, if possible.

In the case of disagreement between the local pathologist and the study pathologist, actions described in the following table were taken.

| <b>Table S1. Resolution of disagreements between the study pathologist and local pathologists</b> |                                      |                                          |                                      |                                                                                                                   |                                                   |
|---------------------------------------------------------------------------------------------------|--------------------------------------|------------------------------------------|--------------------------------------|-------------------------------------------------------------------------------------------------------------------|---------------------------------------------------|
| <b>Study Pathologist</b>                                                                          |                                      |                                          |                                      |                                                                                                                   |                                                   |
| <b>Local Pathologist</b>                                                                          | <b>Serrated Polyp</b>                | <b>Adenoma/ Cancer</b>                   | <b>Mixed*</b>                        | <b>Other†</b>                                                                                                     | <b>Slides available only to local pathologist</b> |
| <b>Serrated Polyp</b>                                                                             | No disagreement                      | Obtain second read‡ by study pathologist | Obtain 2nd read by study pathologist | If study pathologist saw only 1 tissue level, use local diagnosis; otherwise obtain 2nd read by study pathologist | Use local diagnosis                               |
| <b>Adenoma/ Cancer</b>                                                                            | Obtain 2nd read by study pathologist | No disagreement                          | Use study pathologist diagnosis      | If study pathologist saw only 1 tissue level, use local diagnosis; otherwise obtain 2nd read by study pathologist | Use local diagnosis                               |
| <b>Mixed</b>                                                                                      | Obtain 2nd read by study pathologist | Obtain 2nd read by study pathologist     | No disagreement                      | Obtain 2nd read by study pathologist                                                                              | Use local diagnosis                               |
| <b>Other</b>                                                                                      | Use study pathologist diagnosis      | Use study pathologist diagnosis          | Obtain 2nd read by study pathologist | No disagreement                                                                                                   | Use local diagnosis                               |

\*Two distinct histological diagnoses (e.g. tubular adenoma and hyperplastic polyp -- in current terminology, a sessile serrated adenoma with conventional dysplasia).

†Non-neoplastic diagnosis: normal mucosa, inflammation, lymphoid aggregate, etc.

‡The second read by the study pathologist is conducted blinded to knowledge of the first diagnosis.

### **Measurement of serum calcium, creatinine and 25-OH Vitamin D**

Calcium and creatinine were assayed using standard procedures at laboratories associated with the clinical centers. 25-OH-vitamin D was assayed centrally using the IDS (Fountain Hills, AZ) liquid phase radioimmunoassay which has a sensitivity of 5 ng/l. The inter-assay CVs were 4.3% (at 12.9 ng/ml), 10.3% (at 21.1 ng/ml), and 4.5% (at 57.6 ng/ml). Blinded aliquots from a large pooled sample, sent with most sample shipments, yielded a between-batch CV of 4.1%.

### **Computation of seasonally adjusted serum 25-OH Vitamin D**

To obtain baseline season-adjusted 25-OH-vitamin D levels, we first calculated separate means for each month of blood draw. For each participant, we calculated the difference between the 25-OH-vitamin D level and the appropriate monthly mean. This residual was then added to the overall mean of all participants in all months. Year 1, year 3 and end of treatment seasonally-adjusted levels were calculated separately by Vitamin D treatment in a similar manner.

### **Semiannual estimation of dietary calcium and vitamin D intake**

To monitor participants' calcium and vitamin D intakes, a calcium and vitamin D dietary screener was used at enrollment and every semiannual interview. This brief screening tool was developed from the NHANES 1999-2001 dietary recall data by Nutritionquest (Berkeley, CA). It includes 25 food intake questions, without portion size responses.

### **Randomization of Ineligible Participants**

Fifteen ineligible participants were randomized. All were retained in the analysis if follow-up information was available.

Four participants had a documented history of urolithiasis despite having given negative reports during recruitment. (One of these was an incidental finding on CT scan that might not have been communicated to the patient.) Two participants had completed treatment when the urolithiasis history was discovered; two were removed from treatment. None had a recurrence during study participation.

Five participants did not have an adenoma at baseline. In each case, the local pathology report noted adenomatous tissue in a polyp coexisting with serrated tissue. These would now be labeled a sessile serrated adenoma/polyp with dysplasia. A covariate in our analyses is number of baseline adenomas; for this variable, these participants are considered to have 1 adenoma at baseline.

Four participants did not have all polyps removed from the large bowel. In each case one or more small rectal polyps remained.

Transcription errors led to randomization of two participants despite baseline blood calcium levels outside the normal range. The true values were 10.3 mg/dL (upper limit of normal 10.2 mg/dL), and 8.4 mg/dL (lower limit of normal 8.5 mg/dL). These participants were retained on study treatment.

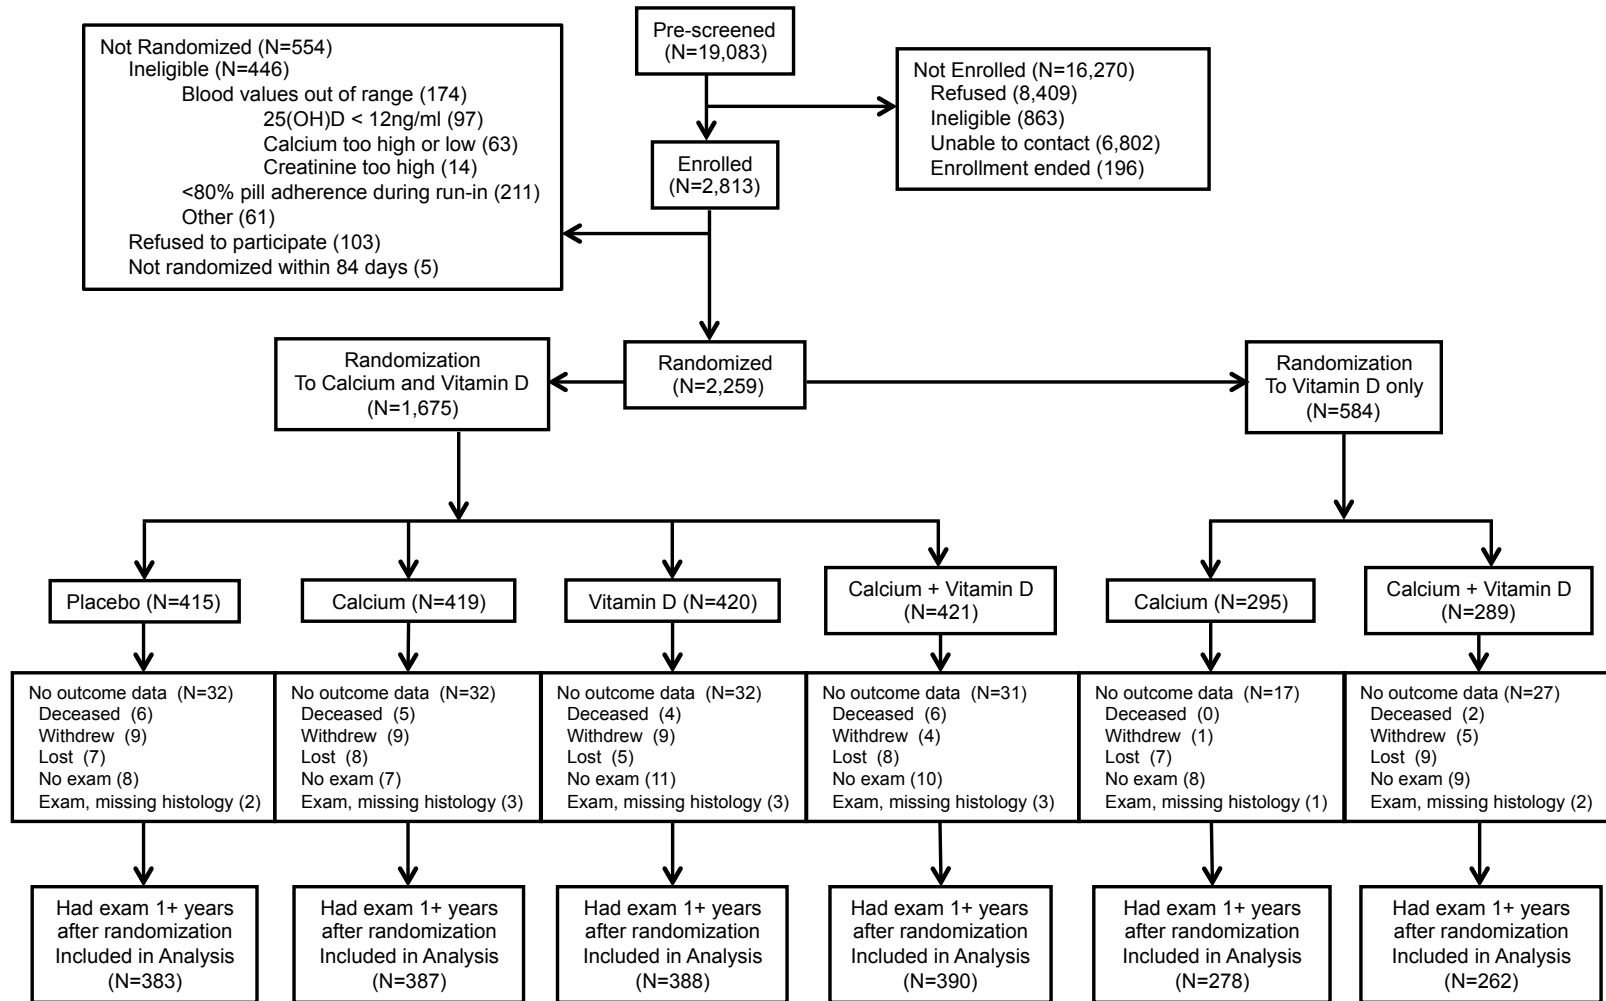

Figure S1. Consort Diagram

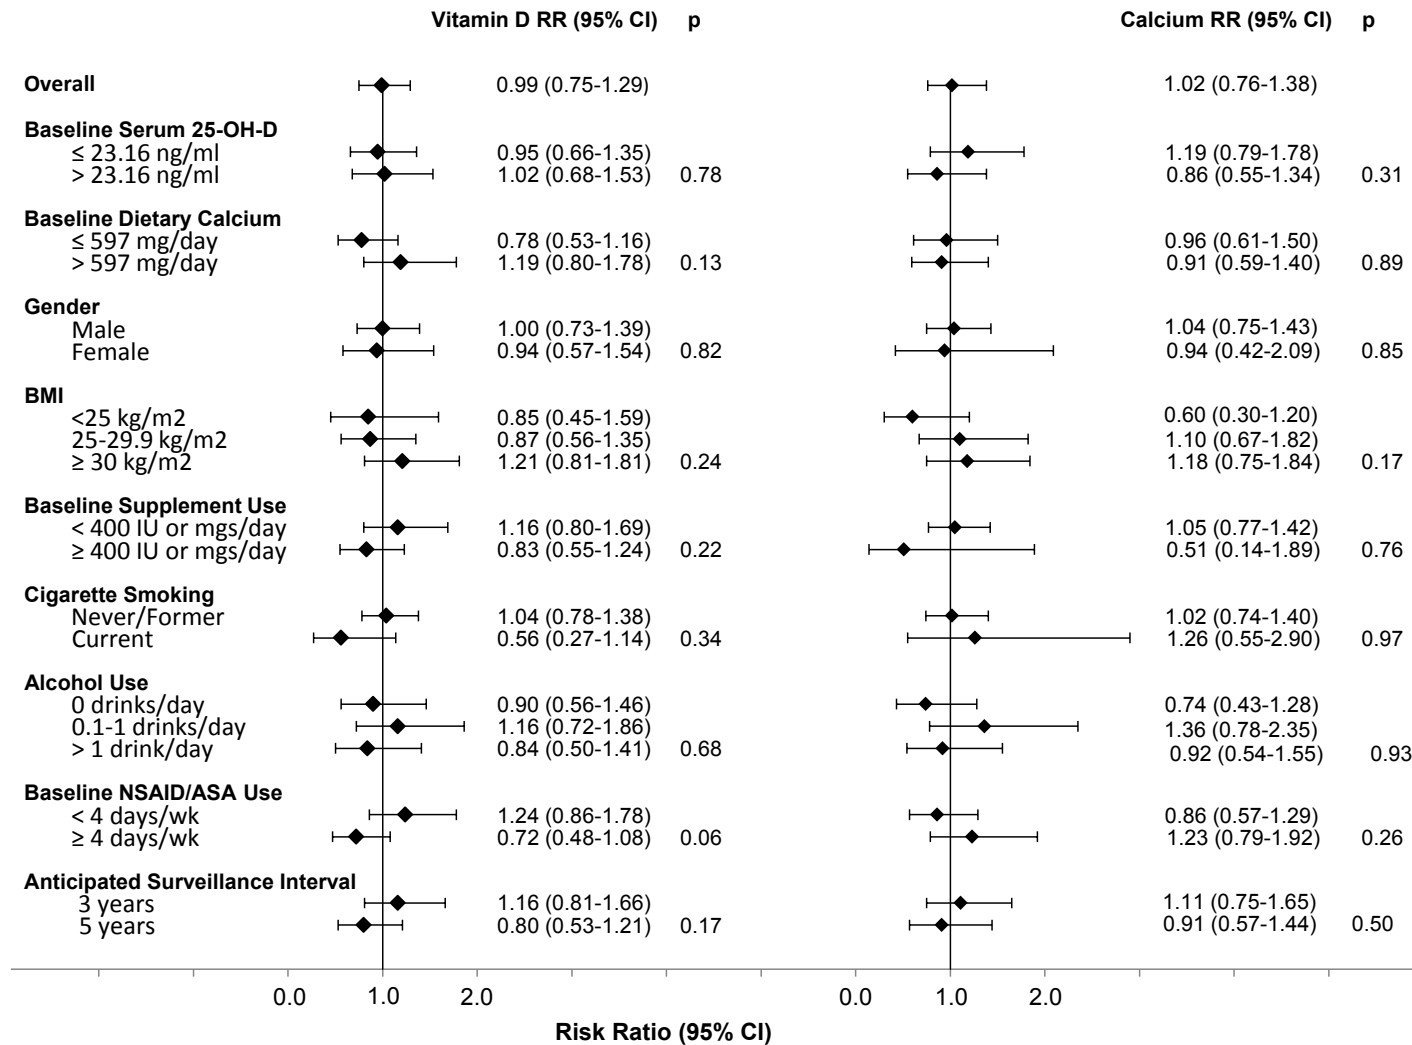

Figure S2. Subgroup Treatment Effects for Supplementation with Calcium or Vitamin D: One or More Advanced Adenomas



| <b>Table S2. Years from Randomization to Final Colonoscopy</b> |          |             |                  |               |
|----------------------------------------------------------------|----------|-------------|------------------|---------------|
| <b>Study treatment</b>                                         | <b>N</b> | <b>Mean</b> | <b>Std Error</b> | <b>Median</b> |
| <b>Full Factorial Participants:</b>                            |          |             |                  |               |
| Calcium + Placebo                                              | 387      | 3.73        | 0.06             | 3.57          |
| Calcium + Vitamin D                                            | 390      | 3.76        | 0.06             | 3.49          |
| Placebo + Placebo                                              | 383      | 3.73        | 0.06             | 3.46          |
| Placebo + Vitamin D                                            | 388      | 3.76        | 0.06             | 3.49          |
| <b>2-Arm Participants:</b>                                     |          |             |                  |               |
| Vitamin D                                                      | 262      | 3.79        | 0.07             | 3.84          |
| Placebo                                                        | 278      | 3.79        | 0.07             | 3.91          |

P for difference between the 6 groups: 0.81.

P for difference between no vitamin D vs. vitamin D: 0.38.

P for difference between no calcium vs. calcium: 0.84.

P for difference between vitamin D+calcium vs. calcium: 0.33.

P for difference between vitamin D+calcium vs. neither: 0.34.

80.4% of participants with a recommended 3-year surveillance interval had a colonoscopy within 6 months of the anticipated time (9% earlier and 11% later). 72.8% of participants with a recommended 5-year surveillance interval had a colonoscopy within 6 months of the anticipated time (20% earlier and 7% later).

**Table S3. Adenoma Risk Ratios By Anatomic Location**

| Event                                            | Left (Splenic Flexure through Rectum) |                      | Right (Cecum through Transverse Colon) |                      |
|--------------------------------------------------|---------------------------------------|----------------------|----------------------------------------|----------------------|
|                                                  | Events/N (%)                          | Risk Ratio* (95% CI) | Events/N (%)                           | Risk Ratio* (95% CI) |
| <b>One or More Adenomas</b>                      |                                       |                      |                                        |                      |
| No Vitamin D                                     | 181/1024 (17.7)                       | reference            | 322/1034 (31.1)                        | reference            |
| Vitamin D                                        | 205/1013 (20.2)                       | 1.13 (0.94-1.35)     | 324/1035 (31.3)                        | 0.98 (0.87-1.12)     |
| No Calcium                                       | 159/752 (21.1)                        | reference            | 270/769 (35.1)                         | reference            |
| Calcium                                          | 159/750 (21.2)                        | 1.00 (0.82-1.22)     | 255/764 (33.4)                         | 0.94 (0.82-1.08)     |
| Calcium                                          | 109/649 (16.8)                        | reference            | 186/653 (28.5)                         | reference            |
| Vitamin D + Calcium                              | 118/636 (18.6)                        | 1.09 (0.86-1.38)     | 190/647 (29.4)                         | 1.01 (0.85-1.20)     |
| Neither Vitamin D nor Calcium                    | 72/375 (19.2)                         | reference            | 136/381 (35.7)                         | reference            |
| Vitamin D + Calcium                              | 83/377 (22.0)                         | 1.12 (0.84-1.49)     | 128/386 (33.2)                         | 0.90 (0.74-1.10)     |
| <b>One or More Advanced Adenomas<sup>†</sup></b> |                                       |                      |                                        |                      |
| No Vitamin D                                     | 40/1045 (3.8)                         | reference            | 65/1047 (6.2)                          | reference            |
| Vitamin D                                        | 38/1035 (3.7)                         | 0.95 (0.61-1.47)     | 63/1039 (6.1)                          | 0.94 (0.67-1.31)     |
| No Calcium                                       | 33/768 (4.3)                          | reference            | 53/771 (6.9)                           | reference            |
| Calcium                                          | 27/773 (3.5)                          | 0.81 (0.49-1.34)     | 55/776 (7.1)                           | 1.00 (0.69-1.44)     |
| Calcium                                          | 24/663 (3.6)                          | reference            | 41/664 (6.2)                           | reference            |
| Vitamin D + Calcium                              | 21/649 (3.2)                          | 0.88 (0.49-1.57)     | 34/651 (5.2)                           | 0.81 (0.52-1.26)     |
| Neither Vitamin D nor Calcium                    | 16/382 (4.2)                          | reference            | 24/383 (6.3)                           | reference            |
| Vitamin D + Calcium                              | 12/388 (3.1)                          | 0.70 (0.33-1.47)     | 25/389 (6.4)                           | 0.96 (0.55-1.67)     |

Analyses of no vitamin D vs. vitamin D include all randomized participants; analyses of no calcium vs. calcium and of neither agent vs. both agents are restricted to full factorial participants; analyses of calcium vs. both agents exclude full factorial participants randomized to placebo or vitamin D alone.

\*Adjusted for age, clinical center, anticipated surveillance interval (3 or 5 years), 3 level variable for sex and arm of randomization (male, 2-arm female, full factorial female), number of baseline adenomas (1, 2, 3+).

†Denominators may differ between adenomas and advanced adenomas due to missing lesion size and an assumption that small lesions (<6mm) with missing pathology data are not advanced adenomas (see Pathology Procedures and Rules above).

**Table S4. Adenoma Risk Ratios by Baseline Supplement Use**

| Supplement use at baseline                 | Treatment      |                     | Risk Ratio* (95% CI) |                            |
|--------------------------------------------|----------------|---------------------|----------------------|----------------------------|
|                                            | Events/N (%)   | Events/N (%)        |                      |                            |
| <b>Vitamin D supplement</b>                | No Vitamin D   | Vitamin D           |                      |                            |
| 0                                          | 204/450 (45.3) | 190/438 (43.4)      | 0.95 (0.82-1.11)     |                            |
| 1-400 IU                                   | 171/415 (41.2) | 169/400 (42.3)      | 0.99 (0.84-1.17)     |                            |
| >400 IU                                    | 28/74 (37.8)   | 39/90 (43.3)        | 1.16 (0.77-1.75)     | P for trend† = 0.37        |
| <b>Calcium supplement</b>                  | No calcium     | Calcium             |                      |                            |
| 0                                          | 179/365 (49.0) | 164/380 (43.2)      | 0.87 (0.74-1.02)     |                            |
| 1-399 mg                                   | 138/309 (44.7) | 139/297 (46.8)      | 1.04 (0.87-1.24)     |                            |
| ≥400 mg                                    | 20/39 (51.3)   | 21/41 (51.2)        | 0.87 (0.51-1.48)     | P for trend = 0.34         |
| <b>Vitamin D supplement</b>                | Calcium        | Calcium + Vitamin D |                      |                            |
| 0                                          | 112/266 (42.1) | 100/253 (39.5)      | 0.93 (0.75-1.15)     |                            |
| 1-400 IU                                   | 97/255 (38.0)  | 104/246 (42.3)      | 1.04 (0.83-1.29)     |                            |
| >400 IU                                    | 21/61 (34.4)   | 26/68 (38.2)        | 1.16 (0.68-1.97)     | P for trend = 0.26         |
| <b>Calcium &amp; Vitamin D supplements</b> | Neither        | Calcium + Vitamin D |                      |                            |
| No calcium and no Vitamin D                | 89/180 (49.4)  | 77/189 (40.7)       | 0.83 (0.65-1.05)     |                            |
| <400 mg calcium and ≤ 400 IU Vitamin D     | 68/146 (46.6)  | 72/142 (50.7)       | 1.05 (0.82-1.35)     |                            |
| ≥400 mg calcium or > 400 IU Vitamin D      | 15/26 (57.7)   | 14/27 (51.9)        | 0.79 (0.40-1.57)     | P for heterogeneity = 0.55 |

Analyses of no vitamin D vs. vitamin D include all randomized participants; analyses of no calcium vs. calcium and of neither agent vs. both agents are restricted to full factorial participants; analyses of calcium vs. both agents exclude full factorial participants randomized to placebo or vitamin D alone.

\*Adjusted for age, clinical center, anticipated surveillance interval (3 or 5 years), 3 level variable for sex and arm of randomization (male, 2-arm female, full factorial female), number of baseline adenomas (1, 2, 3+).

†P for trend obtained using midpoints of the supplement categories (vitamin D: 0, 400, 600; calcium: 0, 200, 700).

**Table S5. Advanced Adenoma Risk Ratios by Baseline Supplement Use**

| Supplement use at baseline                       | Treatment     |                     | Risk Ratio* (95% CI) |                                 |
|--------------------------------------------------|---------------|---------------------|----------------------|---------------------------------|
|                                                  | Events/N (%)  | Events/N (%)        |                      |                                 |
| <b>Baseline Vitamin D supplement</b>             | No Vitamin D  | Vitamin D           |                      |                                 |
| 0                                                | 44/450 (9.8)  | 53/445 (11.9)       | 1.19 (0.81-1.73)     |                                 |
| 1-400 IU                                         | 43/422 (10.2) | 27/400 (6.8)        | 0.65 (0.41-1.03)     |                                 |
| >400 IU                                          | 6/72 (8.3)    | 11/92 (12.0)        | 1.46 (0.55-3.89)     | P for trend <sup>†</sup> = 0.27 |
| <b>Baseline Calcium supplement</b>               | No calcium    | Calcium             |                      |                                 |
| 0                                                | 43/367 (11.7) | 43/385 (11.2)       | 0.95 (0.64-1.42)     |                                 |
| 1-399 mg                                         | 27/309 (8.7)  | 32/303 (10.6)       | 1.20 (0.73-1.97)     |                                 |
| ≥400 mg                                          | 5/40 (12.5)   | 5/42 (11.9)         | 0.51 (0.14-1.89)     | P for trend = 0.87              |
| <b>Baseline Vitamin D supplement</b>             | Calcium       | Calcium + Vitamin D |                      |                                 |
| 0                                                | 28/266 (10.5) | 26/258 (10.1)       | 0.95 (0.57-1.58)     |                                 |
| 1-400 IU                                         | 27/262 (10.3) | 16/247 (6.5)        | 0.59 (0.33-1.08)     |                                 |
| >400 IU                                          | 3/59 (5.1)    | 9/68 (13.2)         | 2.78 (0.74-10.35)    | P for trend = 0.78              |
| <b>Baseline Calcium and Vitamin D supplement</b> | Neither       | Calcium + Vitamin D |                      |                                 |
| No calcium and no Vitamin D                      | 16/180 (8.9)  | 20/194 (10.3)       | 1.12 (0.59-2.11)     |                                 |
| <400 mg calcium and ≤ 400 IU Vitamin D           | 15/146 (10.3) | 13/145 (9.0)        | 0.85 (0.42-1.73)     |                                 |
| ≥400 mg calcium or > 400 IU Vitamin D            | 4/26 (15.4)   | 3/26 (11.5)         | 0.53 (0.11-2.58)     | P for heterogeneity = 0.75      |

Analyses of no vitamin D vs. vitamin D include all randomized participants; analyses of no calcium vs. calcium and of neither agent vs. both agents are restricted to full factorial participants; analyses of calcium vs. both agents exclude full factorial participants randomized to placebo or vitamin D alone.

\*Adjusted for age, clinical center, anticipated surveillance interval (3 or 5 years), 3 level variable for sex and arm of randomization (male, 2-arm female, full factorial female), number of baseline adenomas (1, 2, 3+). Due to sparse data for advanced adenomas, clinical center is adjusted for using geographically grouped centers (southeast: Georgia, North Carolina, South Carolina, Puerto Rico vs north: Ohio, New Hampshire, Iowa, Minnesota vs west: Colorado, Texas, California).

†P for trend obtained using midpoints of the supplement categories (vitamin D: 0, 400, 600; calcium: 0, 200, 700).

**Table S6. Adenoma Risk Ratios by Baseline Advanced/Multiple Adenoma Status**

| Event                                 | 0, 1 or 2 small (<1 cm) tubular adenoma at baseline |                         | Advanced or > 2 adenomas at baseline |                         |                   |
|---------------------------------------|-----------------------------------------------------|-------------------------|--------------------------------------|-------------------------|-------------------|
|                                       | Events/N (%)                                        | Risk Ratio*<br>(95% CI) | Events/N (%)                         | Risk Ratio*<br>(95% CI) | p for interaction |
| <b>One or More Adenomas</b>           |                                                     |                         |                                      |                         |                   |
| No Vitamin D                          | 292/723 (40.4)                                      | reference               | 132/275 (48.0)                       | reference               | 0.91              |
| Vitamin D                             | 287/702 (40.9)                                      | 1.01 (0.89-1.14)        | 139/284 (48.9)                       | 1.00 (0.84-1.19)        |                   |
| No Calcium                            | 236/521 (45.3)                                      | reference               | 115/211 (54.5)                       | reference               | 0.58              |
| Calcium                               | 214/511 (41.9)                                      | 0.91 (0.79-1.05)        | 116/220 (52.7)                       | 0.98 (0.82-1.18)        |                   |
| Calcium                               | 169/452 (37.4)                                      | reference               | 78/178 (43.8)                        | reference               | 0.98              |
| Vitamin D + Calcium                   | 174/452 (38.5)                                      | 1.02 (0.86-1.21)        | 78/170 (45.9)                        | 1.02 (0.80-1.30)        |                   |
| Neither Vitamin D nor Calcium         | 123/271 (45.4)                                      | reference               | 54/97 (55.7)                         | reference               | 0.43              |
| Vitamin D + Calcium                   | 107/259 (41.3)                                      | 0.89 (0.73-1.09)        | 62/110 (56.4)                        | 1.00 (0.77-1.30)        |                   |
| <b>One or More Advanced Adenomas†</b> |                                                     |                         |                                      |                         |                   |
| No Vitamin D                          | 60/730 (8.2)                                        | reference               | 33/275 (12.0)                        | reference               | 0.41              |
| Vitamin D                             | 55/706 (7.8)                                        | 0.95 (0.67-1.35)        | 43/283 (15.2)                        | 1.20 (0.78-1.84)        |                   |
| No Calcium                            | 48/524 (9.2)                                        | reference               | 28/208 (13.5)                        | reference               | 0.16              |
| Calcium                               | 38/517 (7.4)                                        | 0.81 (0.54-1.22)        | 39/223 (17.5)                        | 1.25 (0.79-1.99)        |                   |
| Calcium                               | 38/458 (8.3)                                        | reference               | 21/179 (11.7)                        | reference               | 0.14              |
| Vitamin D + Calcium                   | 29/454 (6.4)                                        | 0.77 (0.48-1.22)        | 27/171 (15.8)                        | 1.29 (0.75-2.21)        |                   |
| Neither Vitamin D nor Calcium         | 22/272 (8.1)                                        | reference               | 12/96 (12.5)                         | reference               | 0.13              |
| Vitamin D + Calcium                   | 15/262 (5.7)                                        | 0.73 (0.38-1.41)        | 22/111 (19.8)                        | 1.55 (0.77-3.10)        |                   |

Analyses of no vitamin D vs. vitamin D include all randomized participants; analyses of no calcium vs. calcium and of neither agent vs. both agents are restricted to full factorial participants; analyses of calcium vs. both agents exclude full factorial participants randomized to placebo or vitamin D alone.

\*Adjusted for age, clinical center, anticipated surveillance interval (3 or 5 years), 3 level variable for sex and arm of randomization (male, 2-arm female, full factorial female), number of baseline adenomas (1, 2, 3+).

†Denominators may differ between adenomas and advanced adenomas due to missing lesion size and an assumption that small lesions (<6mm) with missing pathology data are not advanced adenomas (see Pathology Procedures and Rules above).

| <b>Table S7. Per Protocol* Analysis</b> |                     |                                 |
|-----------------------------------------|---------------------|---------------------------------|
| <b>Event</b>                            | <b>Events/N (%)</b> | <b>Risk Ratio†<br/>(95% CI)</b> |
| <b>One or More Adenomas</b>             |                     |                                 |
| No Vitamin D                            | 318/767 (41.5)      | reference                       |
| Vitamin D                               | 337/796 (42.4)      | 1.00 (0.89-1.13)                |
| No Calcium                              | 283/604 (46.9)      | reference                       |
| Calcium                                 | 259/587 (44.1)      | 0.95 (0.83-1.07)                |
| Calcium                                 | 182/478 (38.1)      | reference                       |
| Vitamin D + Calcium                     | 190/481 (39.5)      | 1.02 (0.87-1.20)                |
| Neither Vitamin D nor Calcium           | 136/289 (47.1)      | reference                       |
| Vitamin D + Calcium                     | 134/300 (44.7)      | 0.95 (0.79-1.13)                |
| <b>One or More Advanced Adenomas‡</b>   |                     |                                 |
| No Vitamin D                            | 74/775 (9.6)        | reference                       |
| Vitamin D                               | 77/802 (9.6)        | 0.96 (0.71-1.31)                |
| No Calcium                              | 64/605 (10.6)       | reference                       |
| Calcium                                 | 64/598 (10.7)       | 0.99 (0.71-1.38)                |
| Calcium                                 | 47/486 (9.7)        | reference                       |
| Vitamin D + Calcium                     | 40/486 (8.2)        | 0.82 (0.54-1.23)                |
| Neither Vitamin D nor Calcium           | 27/289 (9.3)        | reference                       |
| Vitamin D + Calcium                     | 30/306 (9.8)        | 1.01 (0.61-1.69)                |

Analyses of no vitamin D vs. vitamin D include all randomized participants; analyses of no calcium vs. calcium and of neither agent vs. both agents are restricted to full factorial participants; analyses of calcium vs. both agents exclude full factorial participants randomized to placebo or vitamin D alone.

\* Includes participants reporting  $\geq 80\%$  compliance with study tablets, and excluding those who ever took  $\geq 1000\text{IU}$  of non-study vitamin D supplements or  $\geq 400\text{mg}$  of non-study calcium.

† Adjusted for age, clinical center, anticipated surveillance interval (3 or 5 years), 3 level variable for sex and arm of randomization (male, 2-arm female, full factorial female), number of baseline adenomas (1, 2, 3+).

‡ Denominators may differ between adenomas and advanced adenomas due to missing lesion size and an assumption that small lesions ( $<6\text{mm}$ ) with missing pathology data are not advanced

adenomas (see Pathology Procedures and Rules above).

| Quartile*                            | Change in Serum 25-OH-vitamin <sup>†</sup> |                     |                                  | Change in Calcium Intake <sup>‡</sup> |                     |                               |
|--------------------------------------|--------------------------------------------|---------------------|----------------------------------|---------------------------------------|---------------------|-------------------------------|
|                                      | Events/N (%)                               | Risk Ratio (95% CI) | Risk Ratio per 10 ng/ml (95% CI) | Events/N (%)                          | Risk Ratio (95% CI) | Risk Ratio per 200mg (95% CI) |
| <b>One or More Adenomas</b>          |                                            |                     | 0.98 (0.94-1.04)                 |                                       |                     |                               |
| Quartile 1                           | 227/500 (45.4)                             | reference           |                                  | 220/510 (43.1)                        | reference           |                               |
| Quartile 2                           | 209/496 (42.1)                             | 0.90 (0.78-1.04)    |                                  | 245/508 (48.2)                        | 1.16 (1.01-1.34)    |                               |
| Quartile 3                           | 203/496 (40.9)                             | 0.88 (0.77-1.02)    |                                  | 200/505 (39.6)                        | 1.02 (0.88-1.18)    |                               |
| Quartile 4                           | 211/496 (42.5)                             | 0.92 (0.80-1.07)    |                                  | 201/508 (39.6)                        | 0.95 (0.82-1.10)    |                               |
| P for trend <sup>§</sup>             |                                            | 0.28                |                                  |                                       | 0.16                |                               |
| <b>One or More Advanced Adenomas</b> |                                            |                     | 1.06 (0.93-1.21)                 |                                       |                     |                               |
| Quartile 1                           | 54/507 (10.7)                              | reference           |                                  | 38/509 (7.5)                          | reference           |                               |
| Quartile 2                           | 39/496 (7.9)                               | 0.70 (0.47-1.04)    |                                  | 59/511 (11.6)                         | 1.62 (1.09-2.39)    |                               |
| Quartile 3                           | 47/504 (9.3)                               | 0.84 (0.58-1.22)    |                                  | 48/510 (9.4)                          | 1.43 (0.95-2.16)    |                               |
| Quartile 4                           | 50/496 (10.1)                              | 0.91 (0.63-1.32)    |                                  | 46/516 (8.9)                          | 1.26 (0.84-1.91)    |                               |
| P for trend <sup>§</sup>             |                                            | 0.84                |                                  |                                       | 0.56                |                               |

\*Change in Serum 25-OH-vitamin D is measured as the difference between seasonally adjusted serum vitamin D at baseline and seasonally adjusted vitamin D at end of treatment blood draw. Quartile 1: ≤ -1.95 ng/ml; Quartile 2: -1.949 to 3.72 ng/ml; Quartile 3: 3.721-10.29 ng/ml; Quartile 4: 10.291+ ng/ml. Change in calcium intake is measured as the difference between baseline intake (dietary + supplements) and intake at the questionnaire closest in time to the last treatment exam (dietary + supplements + study calcium (either 0 or 1200 mg x overall compliance)),

Quartile 1: ≤ -48 mg; Quartile 2: -47.9 to 460 mg; Quartile 3: 460.1-1026 mg; Quartile 4: 1026.1+ mg.

†Risk Ratio adjusted for age, clinical center, anticipated surveillance interval (3 or 5 years), 3 level variable for sex and arm of randomization (male, 2-arm female, full factorial female), number of baseline adenomas (1, 2, 3+) and calcium treatment assignment (2-arm participants are grouped with full factorial participants receiving calcium).

‡Risk Ratio adjusted for age, clinical center, anticipated surveillance interval (3 or 5 years), 3 level variable for sex and arm of randomization (male, 2-arm female, full factorial female), number of baseline adenomas (1, 2, 3+) and vitamin D treatment assignment.

§P for trend calculated using midpoints of the quartiles.

**Table S9. Adenoma Risk Ratios by Anticipated Colonoscopic Surveillance Interval**

| Event                                 | 3 Year Surveillance Interval |                      | 5 Year Surveillance Interval |                      | P for interaction |
|---------------------------------------|------------------------------|----------------------|------------------------------|----------------------|-------------------|
|                                       | Events/N (%)                 | Risk Ratio* (95% CI) | Events/N (%)                 | Risk Ratio* (95% CI) |                   |
| <b>One or More Adenomas</b>           |                              |                      |                              |                      |                   |
| No Vitamin D                          | 225/529 (42.5)               | reference            | 217/506 (42.9)               | reference            | 0.28              |
| Vitamin D                             | 232/527 (44.0)               | 1.04 (0.90-1.19)     | 206/497 (41.5)               | 0.93 (0.80-1.08)     |                   |
| No Calcium                            | 181/385 (47.0)               | reference            | 181/376 (48.1)               | reference            | 0.47              |
| Calcium                               | 187/403 (46.4)               | 0.98 (0.84-1.14)     | 158/359 (44.0)               | 0.90 (0.77-1.05)     |                   |
| Calcium                               | 136/336 (40.5)               | reference            | 123/319 (38.6)               | reference            | 0.50              |
| Vitamin D + Calcium                   | 140/335 (41.8)               | 1.05 (0.87-1.26)     | 119/308 (38.6)               | 0.96 (0.78-1.17)     |                   |
| Neither Vitamin D nor Calcium         | 89/193 (46.1)                | Reference            | 94/187 (50.3)                | Reference            | 0.20              |
| Vitamin D + Calcium                   | 96/203 (47.3)                | 1.01 (0.81-1.25)     | 78/178 (43.8)                | 0.83 (0.66-1.03)     |                   |
| <b>One or More Advanced Adenomas†</b> |                              |                      |                              |                      |                   |
| No Vitamin D                          | 51/529 (9.6)                 | reference            | 47/513 (9.2)                 | reference            | 0.17              |
| Vitamin D                             | 60/532 (11.3)                | 1.16 (0.81-1.66)     | 38/500 (7.6)                 | 0.80 (0.53-1.21)     |                   |
| No Calcium                            | 41/386 (10.6)                | reference            | 36/378 (9.5)                 | reference            | 0.50              |
| Calcium                               | 49/407 (12.0)                | 1.11 (0.75-1.65)     | 32/366 (8.7)                 | 0.91 (0.57-1.44)     |                   |
| Calcium                               | 35/338 (10.4)                | Reference            | 28/324 (8.6)                 | reference            | 0.33              |
| Vitamin D + Calcium                   | 35/337 (10.4)                | 1.03 (0.66-1.61)     | 21/311 (6.8)                 | 0.76 (0.44-1.31)     |                   |
| Neither Vitamin D nor Calcium         | 16/191 (8.4)                 | Reference            | 19/189 (10.1)                | reference            | 0.21              |
| Vitamin D + Calcium                   | 23/205 (11.2)                | 1.27 (0.67-2.42)     | 14/182 (7.7)                 | 0.70 (0.34-1.43)     |                   |

Analyses of no vitamin D vs. vitamin D include all randomized participants; analyses of no calcium vs. calcium and of neither agent vs. both agents are restricted to full factorial participants; analyses of calcium vs. both agents exclude full factorial participants randomized to placebo or vitamin D alone.

\*Adjusted for age, clinical center, anticipated surveillance interval (3 or 5 years), 3 level variable for sex and arm of randomization (male, 2-arm female, full factorial female), number of baseline adenomas (1, 2, 3+).

†Denominators may differ between adenomas and advanced adenomas due to missing lesion size and an assumption that small lesions (<6mm) with missing pathology data are not advanced adenomas (see Pathology Procedures and Rules above).



**Table S10. Sensitivity analysis for missing data**

| Event                                 | Assuming all participants with missing outcome data had NO adenomas |                      | Assuming all participants with missing outcome data HAD adenomas |                      |
|---------------------------------------|---------------------------------------------------------------------|----------------------|------------------------------------------------------------------|----------------------|
|                                       | Events/N (%)                                                        | Risk Ratio* (95% CI) | Events/N (%)                                                     | Risk Ratio* (95% CI) |
| <b>One or More Adenomas</b>           |                                                                     |                      |                                                                  |                      |
| No Vitamin D                          | 442/1129 (39.2)                                                     | reference            | 536/1129 (47.5)                                                  | reference            |
| Vitamin D                             | 438/1130 (38.8)                                                     | 0.98 (0.88-1.08)     | 544/1130 (48.1)                                                  | 1.00 (0.92-1.09)     |
| No Calcium                            | 362/835 (43.4)                                                      | reference            | 436/835 (52.2)                                                   | reference            |
| Calcium                               | 345/840 (41.1)                                                      | 0.94 (0.84-1.05)     | 423/840 (50.4)                                                   | 0.96 (0.87-1.05)     |
| Calcium                               | 259/714 (36.3)                                                      | reference            | 318/714 (44.5)                                                   | reference            |
| Vitamin D + Calcium                   | 259/710 (36.5)                                                      | 1.00 (0.87-1.14)     | 326/710 (45.9)                                                   | 1.02 (0.91-1.15)     |
| Neither Vitamin D nor Calcium         | 183/415 (44.1)                                                      | reference            | 218/415 (52.5)                                                   | reference            |
| Vitamin D + Calcium                   | 174/421 (41.3)                                                      | 0.92 (0.78-1.07)     | 214/421 (50.8)                                                   | 0.95 (0.83-1.09)     |
| <b>One or More Advanced Adenomas†</b> |                                                                     |                      |                                                                  |                      |
| No Vitamin D                          | 98/1129 (8.7)                                                       | reference            | 185/1129 (16.4)                                                  | reference            |
| Vitamin D                             | 98/1130 (8.7)                                                       | 0.98 (0.75-1.28)     | 196/1130 (17.4)                                                  | 1.05 (0.87-1.26)     |
| No Calcium                            | 77/835 (9.2)                                                        | reference            | 148/835 (17.7)                                                   | reference            |
| Calcium                               | 81/840 (9.6)                                                        | 1.03 (0.76-1.39)     | 148/840 (17.6)                                                   | 0.98 (0.80-1.21)     |
| Calcium                               | 63/714 (8.8)                                                        | reference            | 115/714 (16.1)                                                   | reference            |
| Vitamin D + Calcium                   | 56/710 (7.9)                                                        | 0.89 (0.63-1.25)     | 118/710 (16.6)                                                   | 1.02 (0.81-1.30)     |
| Neither Vitamin D nor Calcium         | 35/415 (8.4)                                                        | reference            | 70/415 (16.9)                                                    | reference            |
| Vitamin D + Calcium                   | 37/421 (8.8)                                                        | 0.99 (0.63-1.56)     | 71/421 (16.9)                                                    | 0.98 (0.72-1.33)     |

Analyses of no vitamin D vs. vitamin D include all randomized participants; analyses of no calcium vs. calcium and of neither agent vs. both agents are restricted to full factorial participants; analyses of calcium vs. both agents exclude full factorial participants randomized to placebo or vitamin D alone.

\* Adjusted for age, clinical center, anticipated surveillance interval (3 or 5 years), 3 level variable for sex and arm of randomization (male, 2-arm female, full factorial female), number of baseline adenomas (1, 2, 3+).

† Denominators may differ between adenomas and advanced adenomas due to missing lesion size and an assumption that small lesions (<6mm) with missing pathology data are not advanced adenomas (see Pathology Procedures and Rules above)
